# Supplementary material for: The Role of Nicotinamide Mononucleotide Supplementation in Psoriasis Treatment
Source: MDPI journal article supplement (doi:10.3390/antiox13020186), 2024-02-01
Supplement: s1 [file s1]

**Supplementary Table S1. Primers (*homo species*) used for RT-PCR**

| Genes                          | Forward                    | Reverse                    |
|--------------------------------|----------------------------|----------------------------|
| <i>IL-6</i>                    | AAGCCAGAGCTGTGCAGATGAGTA   | AAGCCAGAGCTGTGCAGATGAGTA   |
| <i>IL-8</i>                    | GTCCCTTGTTCCACTG TGCCT     | GCTTCCACATGTCCTCACAA       |
| <i>IL-1<math>\alpha</math></i> | TGGCTCA TTTTCCCTCAAAAAGTTG | AGAAATCGTGAAATCCGA AGTCAAG |
| <i>IL-1<math>\beta</math></i>  | CCAGGGACAGGATATGG AGCA     | CCAGGGACAGGATATGG AGCA     |
| <i>TNF-<math>\alpha</math></i> | TCCTTCAGACACCCTCAACC       | TCCTTCAGACACCCTCAACC       |
| <i>D-LOOP1</i>                 | GTACTCCCGATTGAAGCCCC       | CGATGGGCATGAAACTGTGG       |
| <i>D-LOOP2</i>                 | GCTGTCCCCACATTAGGCTT       | GCTCTAGAGGGGGTAGAGGG       |
| <i>D-LOOP3</i>                 | CCGGGGGTATACTACGGTCA       | GTGGGCTCTAGAGGGGGTAG       |
| <i>GAPDH</i>                   | ACAACTTTGGTATCGTGGAAGG     | GCCATCACGCCACAGTTTC        |
| <i>SIRT1</i>                   | TAGCCTTGTCAGATAAGGAAGGA    | TAGCCTTGTCAGATAAGGAAGGA    |

**Supplementary Table S2. Primers (*mus musculus*) used for RT-PCR**

| Genes                          | Forward                | Reverse                |
|--------------------------------|------------------------|------------------------|
| <i>Il-6</i>                    | CACTTCACAAGTCGGAGGCT   | GCCACTCCTTCTGTGACTCC   |
| <i>Il-1<math>\alpha</math></i> | CGAAGACTACGTTCTGCCATT  | GACGTTTCAGAGGTTCTCAGAG |
| <i>Il-1<math>\beta</math></i>  | GCTTCAGGCAGGCAGTATCA   | CTCTGCTTGTGAGGTGCTGA   |
| <i>Tnf-<math>\alpha</math></i> | ATGAGCACAGAAAGCATGATC  | TACAGGCTTGTCACTCGAATT  |
| <i>Il-22</i>                   | GGTGTCTTGTGGCCTCCTATG  | ATAGCCATCGGGACACCAGG   |
| <i>Il-23</i>                   | CACCAGCGGGACATATGAATCT | CACTGGATACGGGGACATT    |
| <i>Il-17A</i>                  | TACCTCAACCGTTCCACGTC   | TTTCCCTCCGCATTGACACA   |
| <i>Gapdh</i>                   | CTGACTTCAACAGCGACACC   | TAGCCAAATTCGTTGTCATACC |
| <i>Sirt1</i>                   | GAGCTGGGGTTTCTGTCTCC   | CTGCAACCTGCTCCAAGGTA   |
| <i>Nrf2</i>                    | AAAGCACAGCCAGCACATTC   | TGGGATTCACGCATAGGAGC   |
| <i>Ho-1</i>                    | GAACCCAGTCTATGCCCCAC   | GGCGTGCAAGGGATGATTTC   |
| <i>Nqo1</i>                    | AGTGGCATCCTGCGTTTCT    | TCTCCTCCCAGACGGTTTC    |
| <i>Sod1</i>                    | GCTTCTCGTCTTGCTCTCTCTG | TCTGCTCGAAGTGGATGGTT   |
| <i>Sod2</i>                    | CCCAAAGGAGAGTTGCTGGA   | TCTGTAAGCGACCTTGCTCC   |
| <i>D-loop</i>                  | AATCTACCATCCTCCGTG     | AATCTACCATCCTCCGTG     |
| <i>18S rRNA</i>                | AATCTACCATCCTCCGTG     | CCTGCTGCCTTCCTTGGA     |
