# Supplementary material for: The Role of Nicotinamide Mononucleotide Supplementation in Psoriasis Treatment
Source: MDPI journal article supplement (doi:10.3390/antiox13020186), 2024-02-01
Supplement: s1 [file s1]

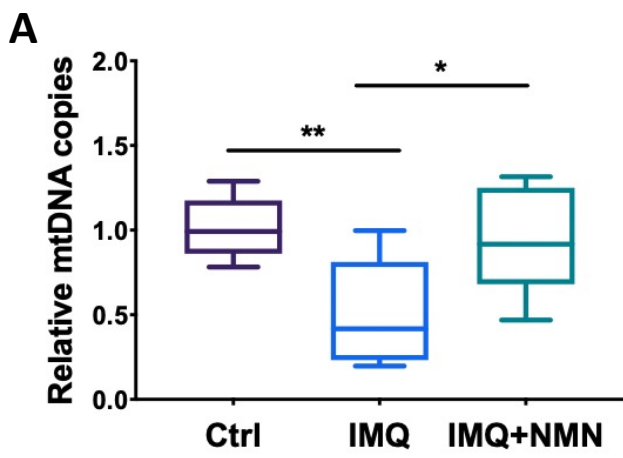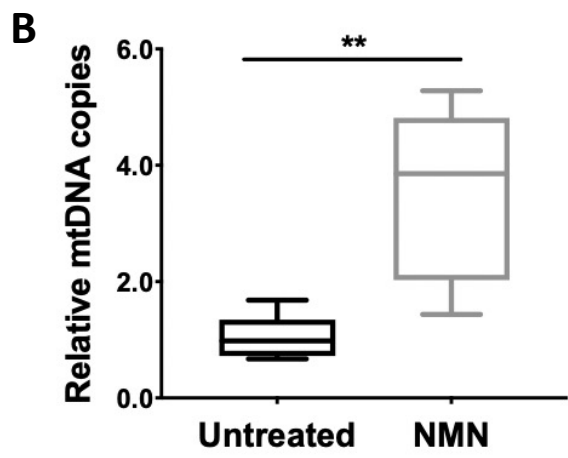

Supplementary Figure S1. mtDNA copies were increased under NMN treatment.

(A) Relative mtDNA copies in Ctrl, IMQ, IMQ+NMN.

(B) Relative mtDNA copies in Untreated, NMN.

Data are mean  $\pm$  SEM, n=6 per group, \*  $p < 0.05$ ; \*\*  $p < 0.01$ ; \*\*\*  $p < 0.001$ ; ns, no significance.
